# Supplementary material for: Live-cell three-dimensional single-molecule tracking reveals modulation of enhancer dynamics by NuRD
Source: Springer Nature journal article supplement (doi:10.1038/s41594-023-01095-4), 2023-09-28

Extended data figure 1a

Western blots showing levels of NuRD components, probed with antibodies as indicated. Arrow shows relevant lane for figure

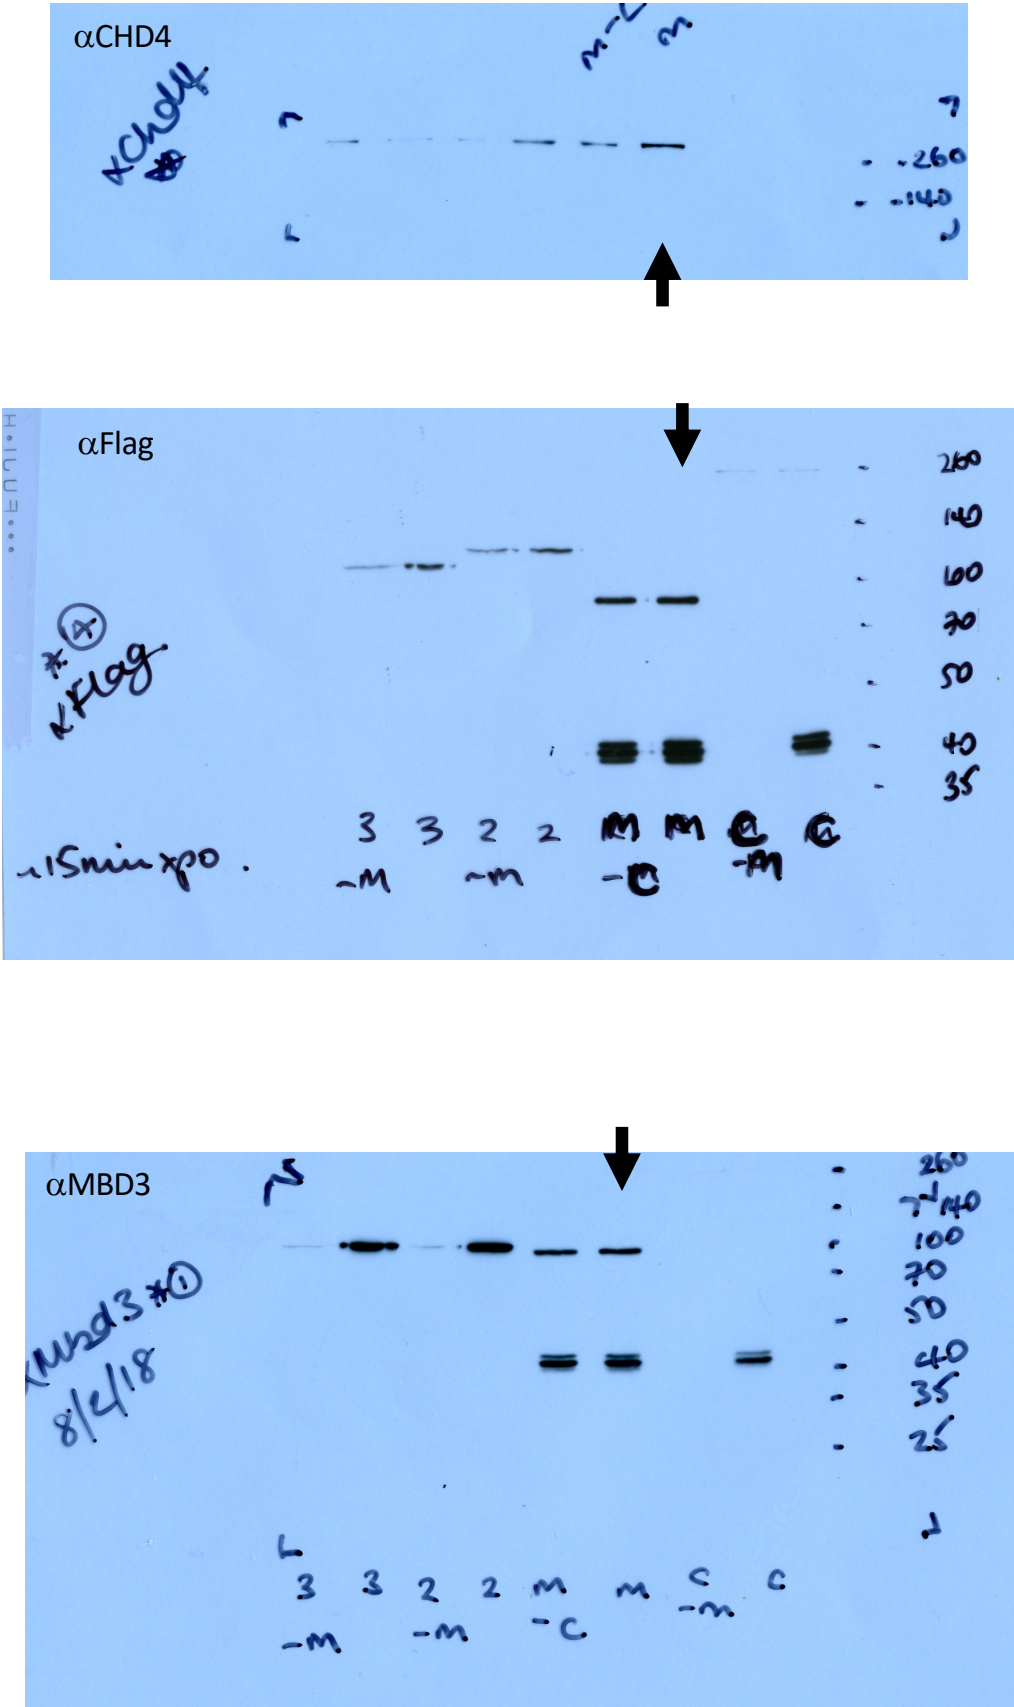

Extended data figure 1a continued

Western blots showing levels of NuRD components, probed with antibodies as indicated. Arrow shows relevant lane for figure

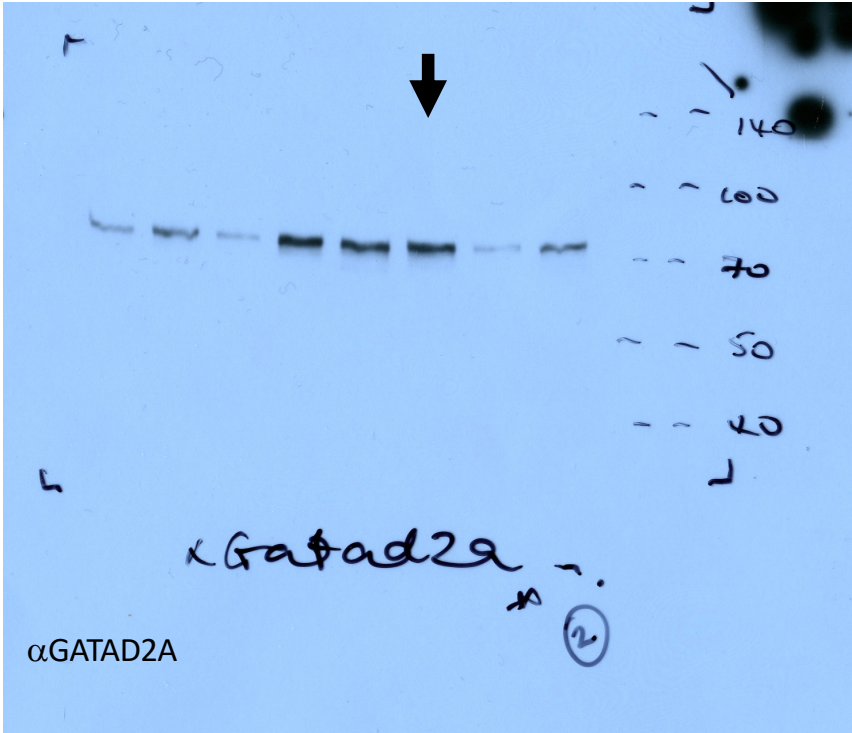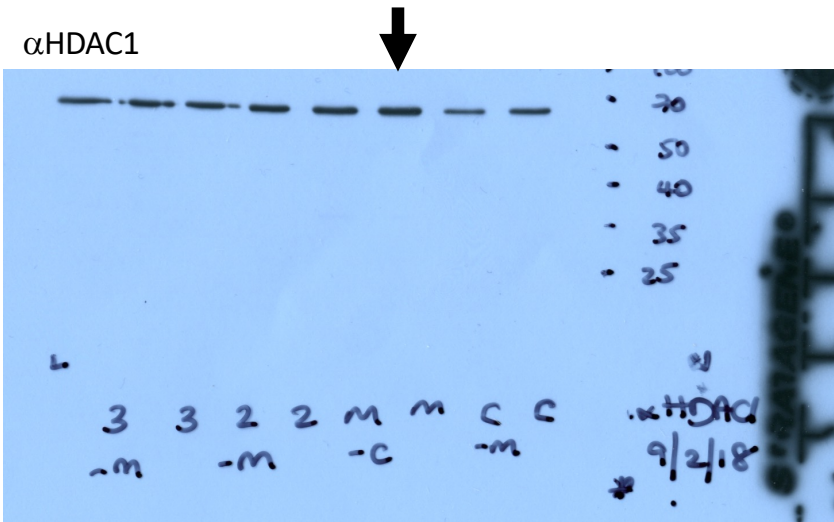

Extended data figure 1b

IP/Western blots probed with antibodies as indicated. Red bar shows relevant lanes.

$\alpha$ CHD4 IP/ Probed  $\alpha$ CHD4

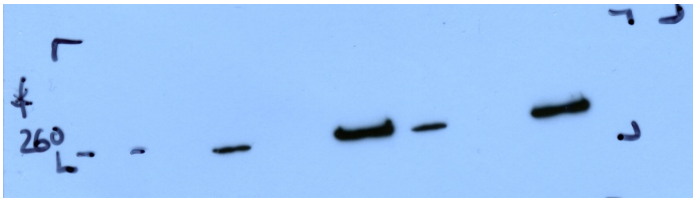

$\alpha$ CHD4 IP/ Probed  $\alpha$ MTA2

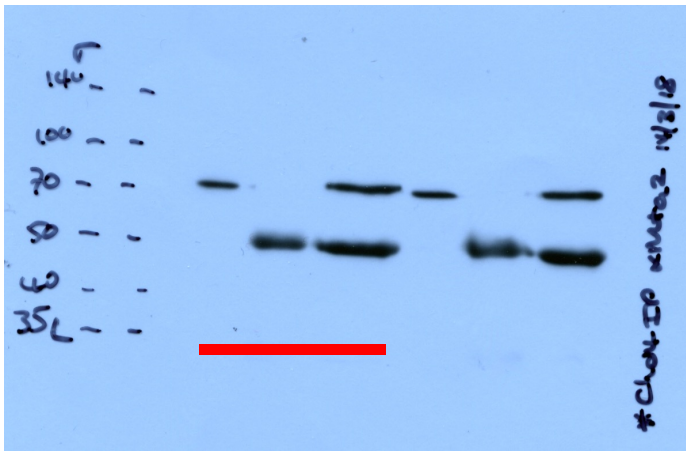

$\alpha$ CHD4 IP/ Probed  $\alpha$ GATAD2A

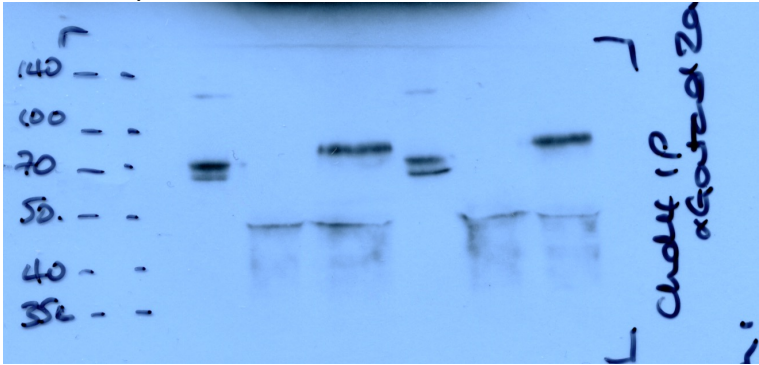

$\alpha$ CHD4 IP/ Probed  $\alpha$ Flag

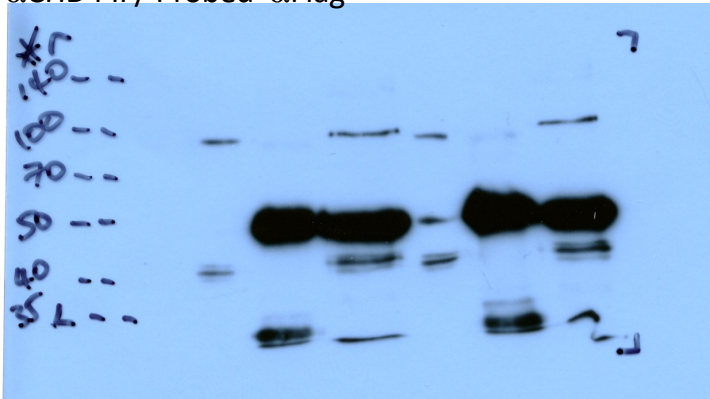

Extended data figure 1b continued

Western blots showing levels of NuRD components, probed with antibodies as indicated. Red box shows relevant lanes for figure

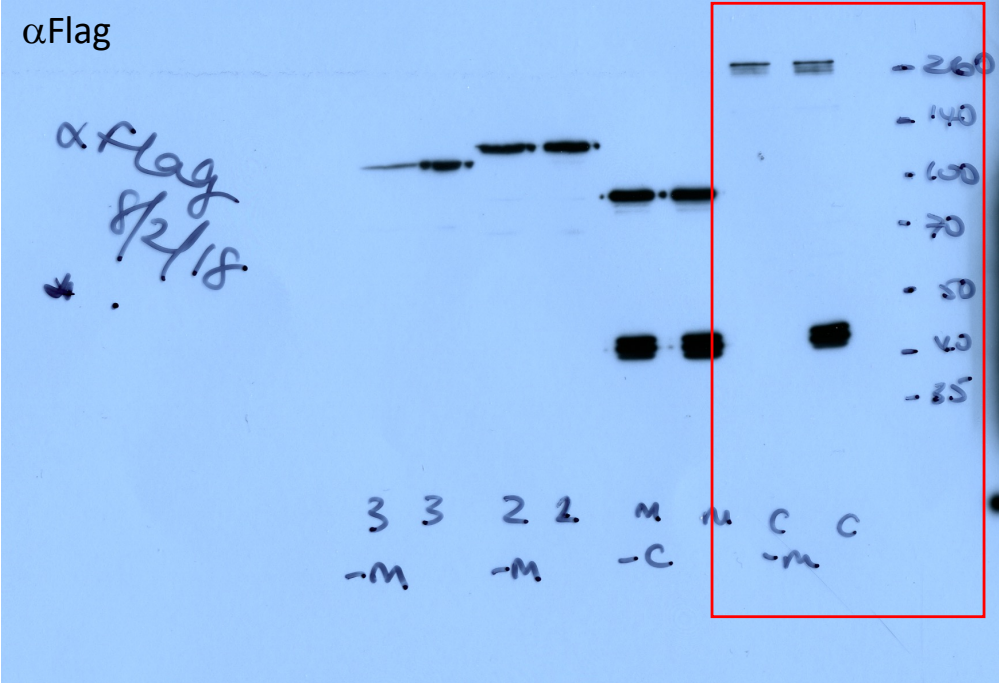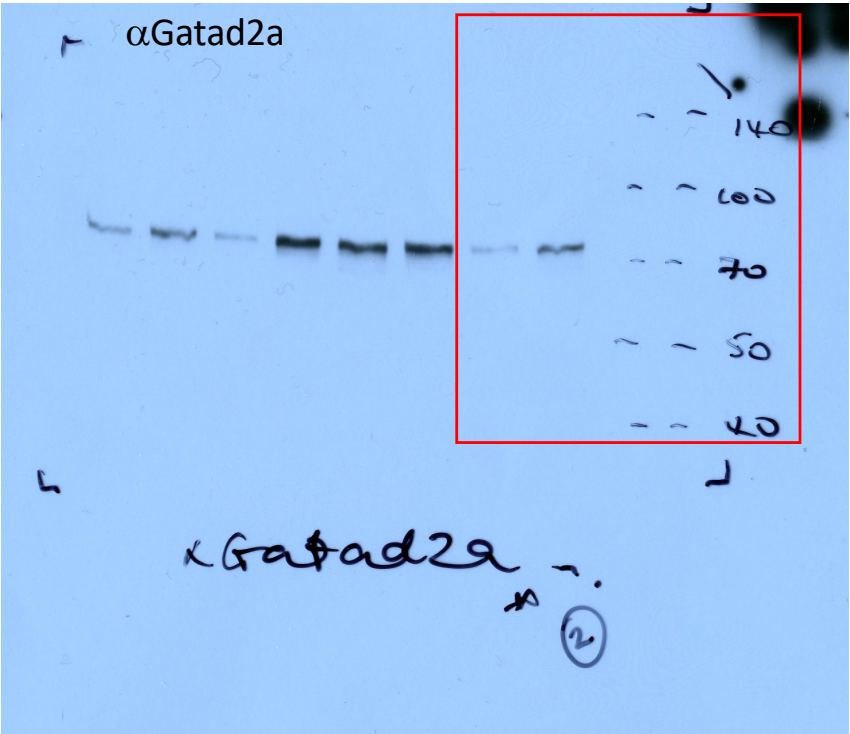

Extended data figure 1c

Western blots showing levels of NuRD components, probed with antibodies as indicated. Red box shows relevant lanes for figure

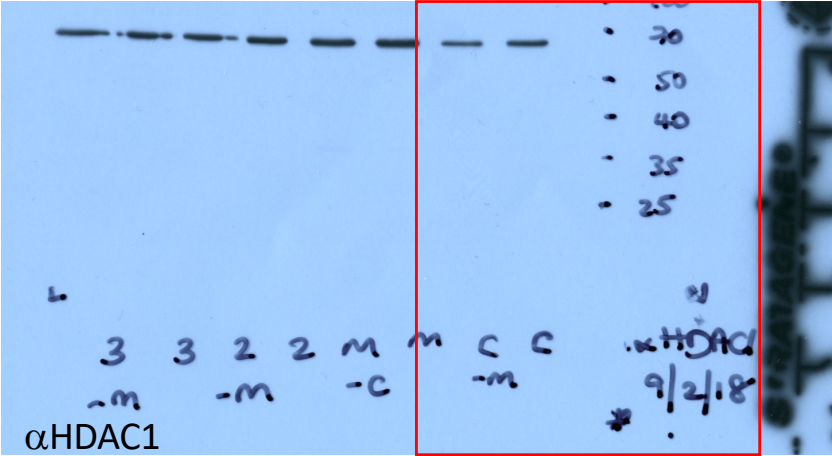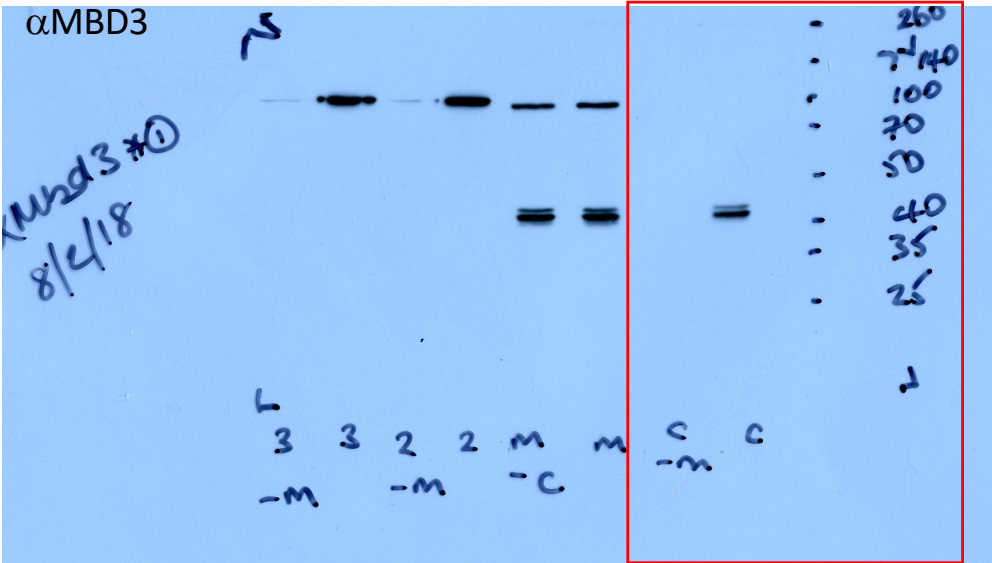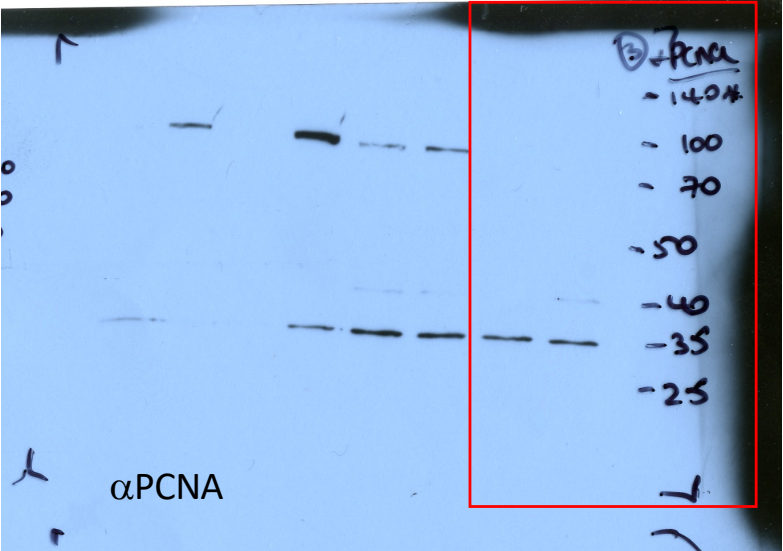

Extended data figure 1c continued

IP/Western blots probed with antibodies as indicated.

CHD4 Pull down / Probed  $\alpha$ Flag

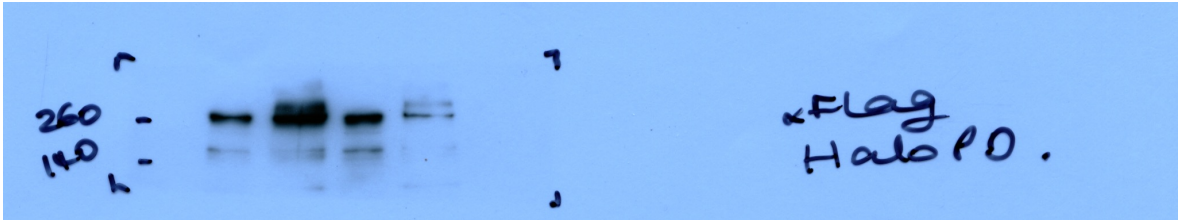

CHD4 Pull down / Probed  $\alpha$ GATAD2A,  $\alpha$ MBD3

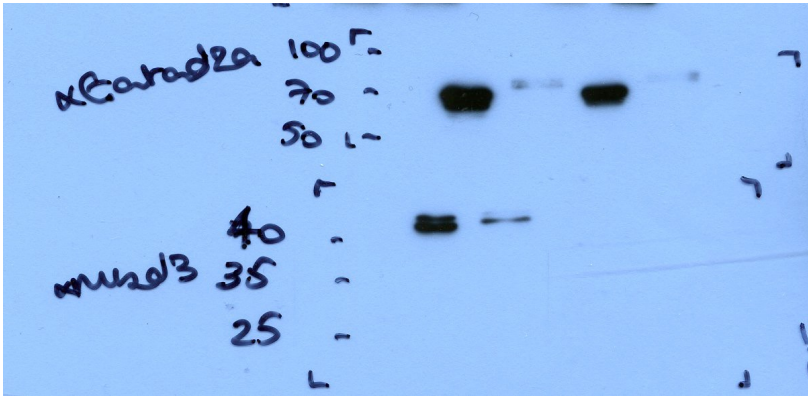

CHD4 Pull down / Probed  $\alpha$ MTA2

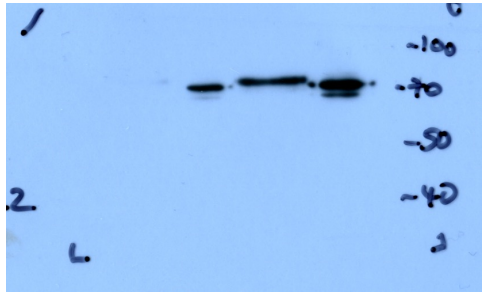

CHD4 Pull down / Probed  $\alpha$ Flag/Gatad2a/Mbd3 (Duplicate experiment, two exposures)

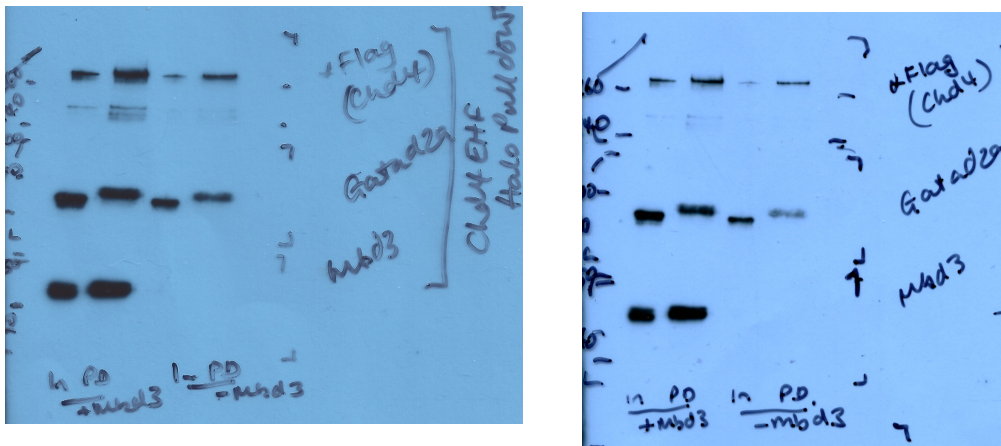

Extended data figure 1d

Western blots showing levels of NuRD components, probed with antibodies as indicated. Red box shows relevant lanes for figure

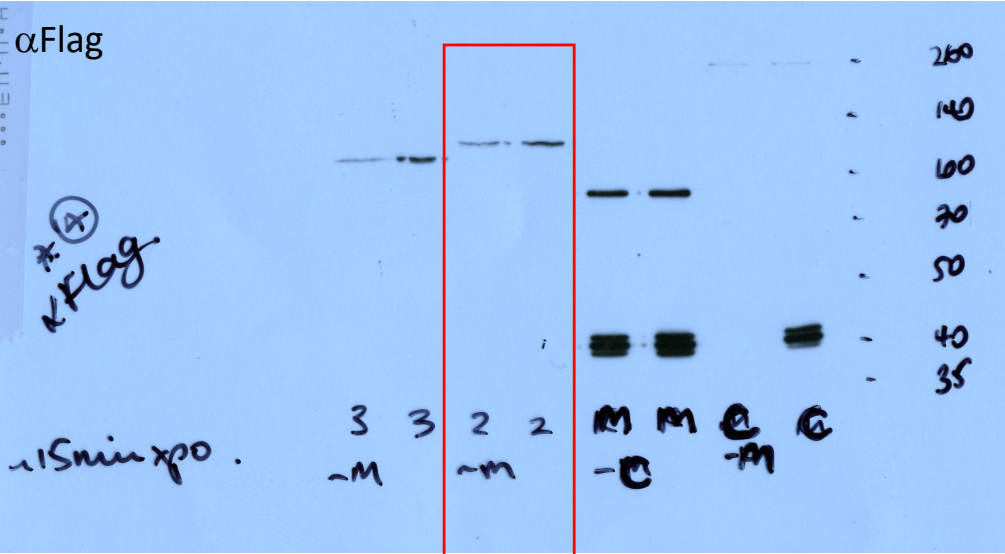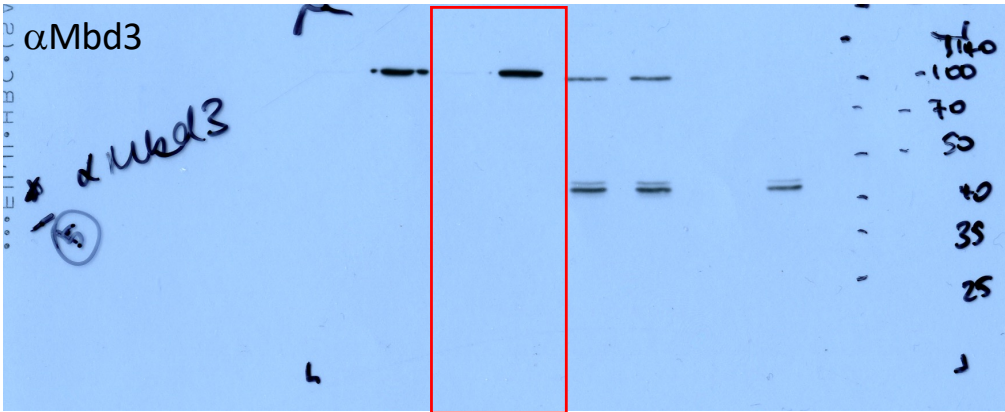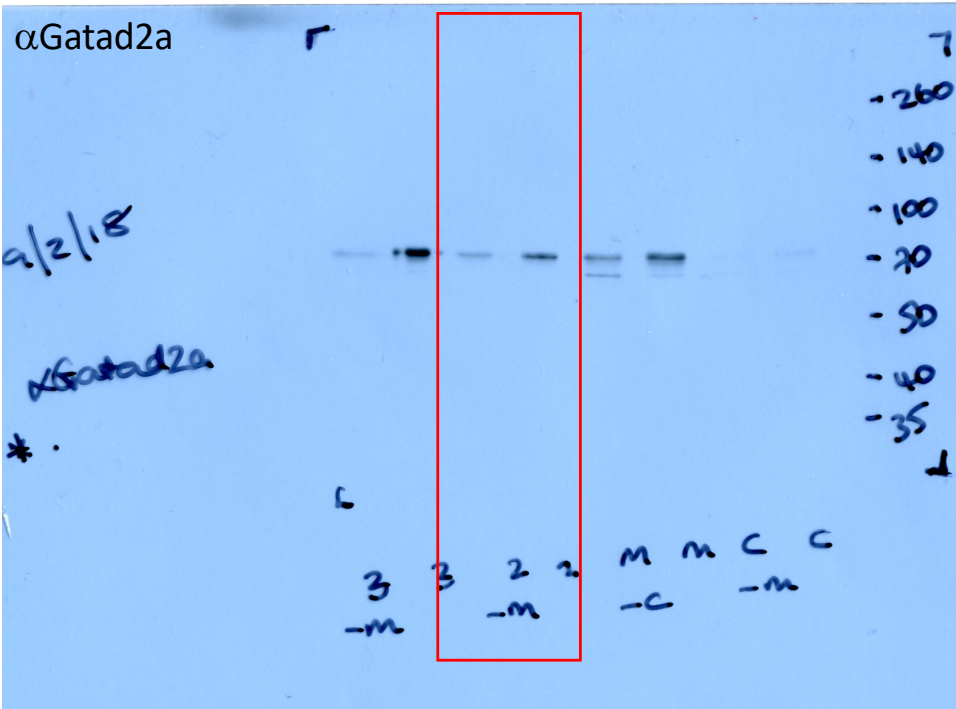

Extended data figure 1d continued

Western blots showing levels of NuRD components, probed with antibodies as indicated. Red box shows relevant lanes for figure

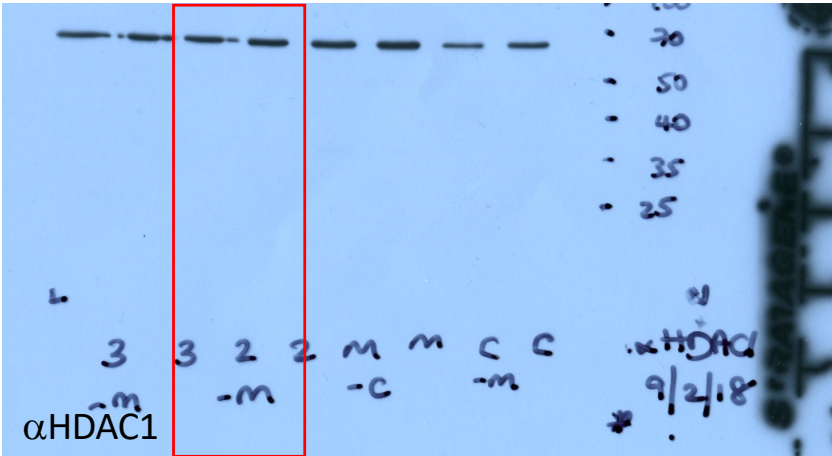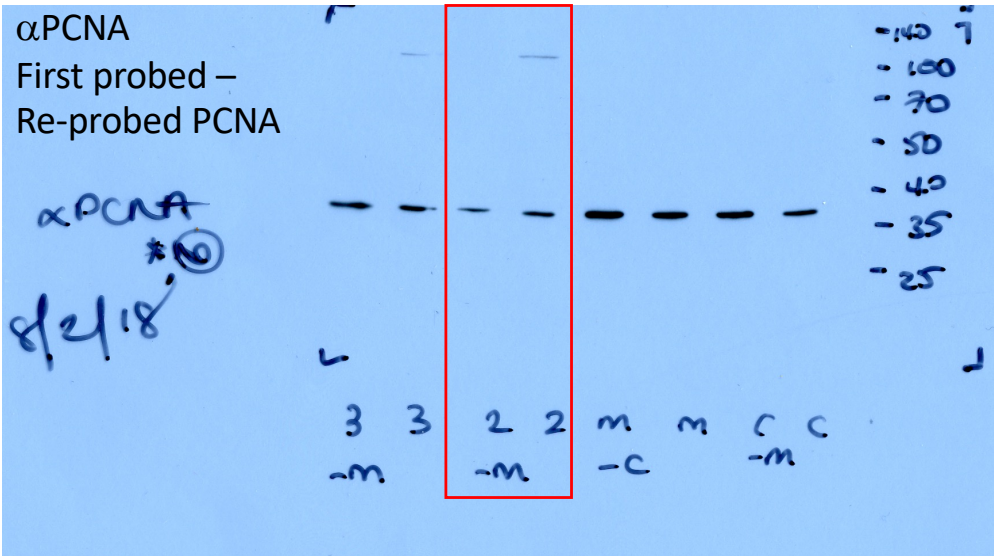

Extended data figure 1d continued

IP/Western blots probed with antibodies as indicated.

MTA2 Pull down / Probed  $\alpha$ CHD4,  $\alpha$ MTA2,  $\alpha$ GATAD2A

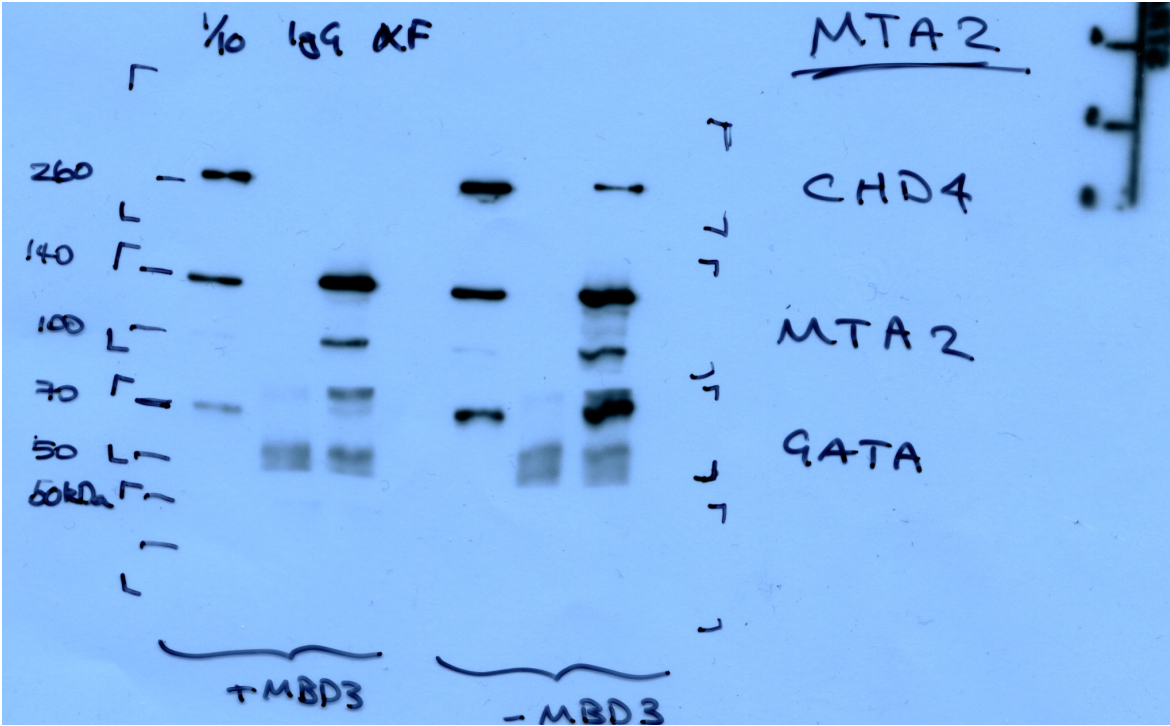

MTA2 Pull down / Probed  $\alpha$ MBD3

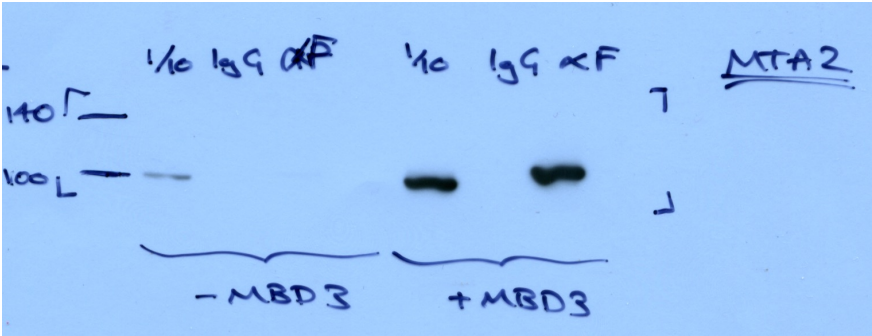

Supplement: MOESM16 [file 41594_2023_1095_MOESM16_ESM.pdf]
